# Supplementary material for: Genetic Signatures of Contrasted Outbreak Histories of “Candidatus Liberibacter asiaticus”, the Bacterium That Causes Citrus Huanglongbing, in Three Outermost Regions of the European Union
Source: PubMed Central journal article supplement (PMC11649586; doi:10.1111/eva.70053), 2024-12-16

Fig. S1

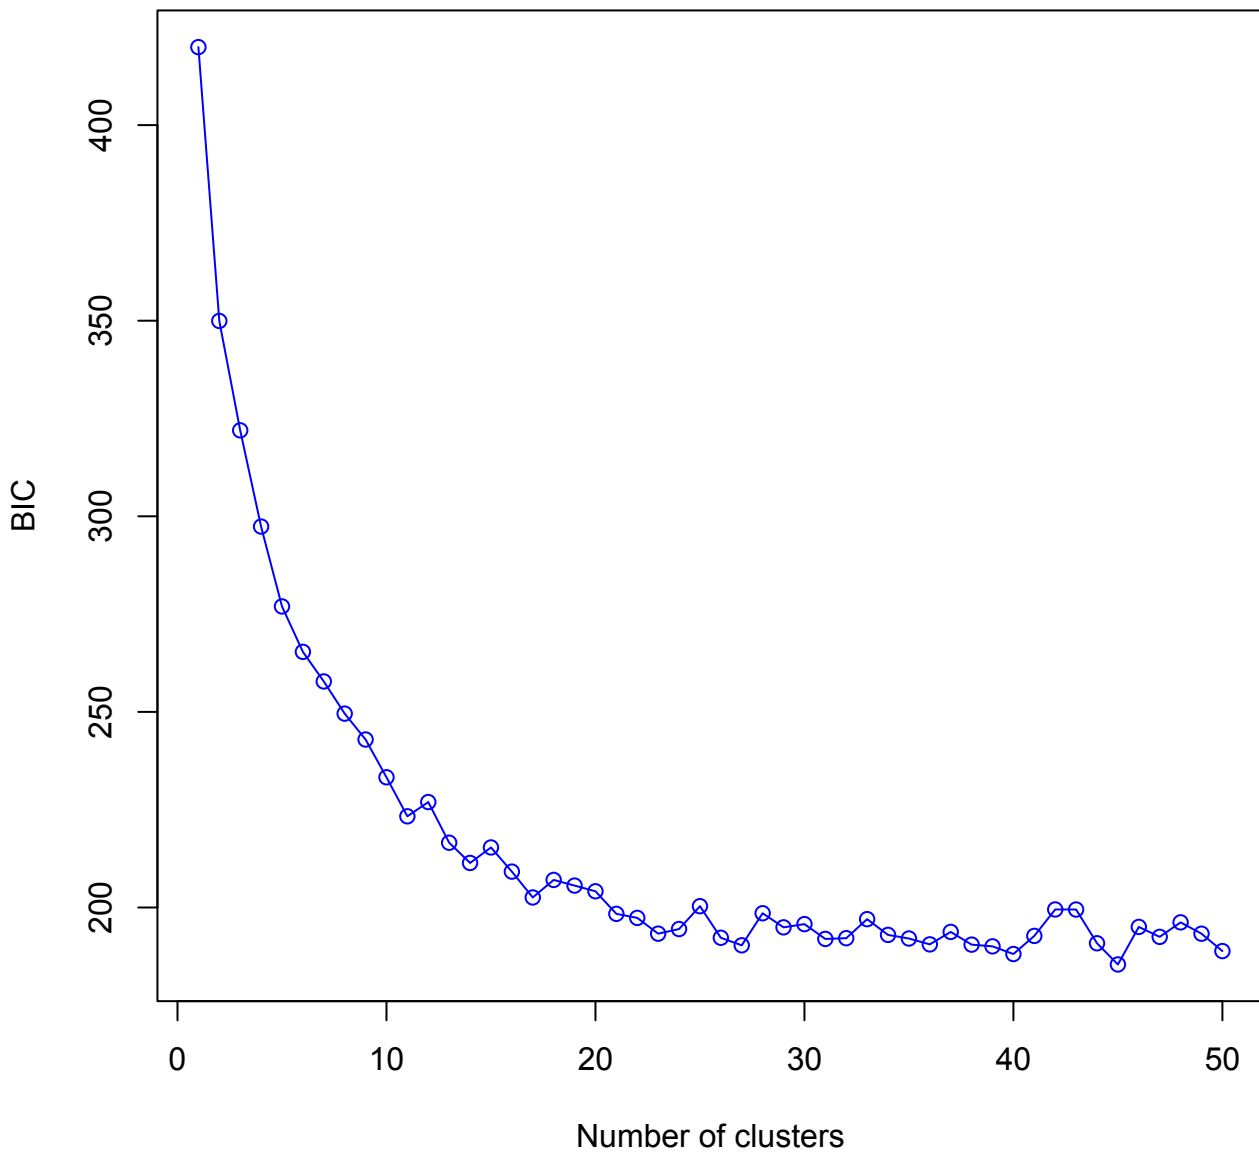

Supplement: EVA-17-e70053-s003.pdf [file EVA-17-e70053-s003.pdf]
